# Supplementary material for: Herpes Simplex Virus Type 1–Encoded miR-H2-3p Manipulates Cytosolic DNA–Stimulated Antiviral Innate Immune Response by Targeting DDX41
Source: PubMed Central journal article supplement (PMC6723821; doi:10.3390/v11080756), 2019-08-15
Supplement: viruses-11-00756-s001.pdf [file viruses-11-00756-s001.pdf]

**Table S1.** The prediction of HSV-1 miRNAs targeting DDX41 by RNAhybrid

| Target sites<br>miRNAs      | Predicted consequential pairing of target region (top)<br>and miRNAs (bottom)             | MFE<br>(kcal/mol) |
|-----------------------------|-------------------------------------------------------------------------------------------|-------------------|
| DDX41(96-101)<br>miR-H2-3p  | 5' AGCAUUAUC <b>GCUCAGC</b> 3'<br>3' CAGCGUGAGCAGGGCA <b>CGAGUCC</b> 5'                   | -20.2             |
| DDX41(125-130)<br>miR-H13   | 5' AGCUGGCCUGGAAUGGGCCAGGCUG <b>GUCCUGG</b> 3'<br>3'GUCACGAGCGUGAAG <b>CGGGAUU</b> 5'     | -20.9             |
| DDX41(175-181)<br>miR-H6-5p | 5'UACUGUUUUUGUUU <b>CCUUUUACCC</b> 3'<br>3'UGUGUGGGGGGGGACAC <b>GGAAGGUGG</b> 5'          | -21.2             |
| DDX41(113-119)<br>miR-H26   | 5' AGCUCAGCUGGCCUGGAA <b>UGGGCCAG</b> 3'<br>3' UGGCAGCGAGUG <b>GCUCGGU</b> 5'             | -21.8             |
| DDX41(125-131)<br>miR-H3-3p | 5' GCUCAGCUGGCCUGGAAUGGGCCAGGC <b>UGGUCCUGGC</b> 3'<br>3' AGGGUUGGCGU <b>GUCAGGGUC</b> 5' | -22.3             |
| DDX41(138-144)<br>miR-H5-5p | 5' UGGCUGCCU <b>GUUCCUG</b> 3'<br>3' AUCUCUACGGGCU <b>UGGGGGGG</b> 5'                     | -22.6             |
| DDX41(19-24)<br>miR-H29     | 5' CAGUCUCCCUUC <b>UCUCCAA</b> 3'<br>3' CAUCAGGAACGGGC <b>GGAGGUC</b> 5'                  | -23.5             |
| DDX41(70-76)<br>miR-H5-5p   | 5'AAGACUGCCACCAGUCUACACAUACAGC <b>AGCCCCUG</b> 3'<br>3'AUCUCUACGGGCU <b>UUGGGGGGG</b> 5'  | -24.7             |
| DDX41(149-155)<br>miR-H29   | 5' CUGGUCCUGGCUGCCUGU <b>UCCUGUGCUUCAGA</b> 3'<br>3' CAUCAGGAACGGGC <b>GGAGGUC</b> 5'     | -29.6             |

Nucleotides in bold fonts show the seed sequence of miRNAs matching DDX41 mRNA sequence.

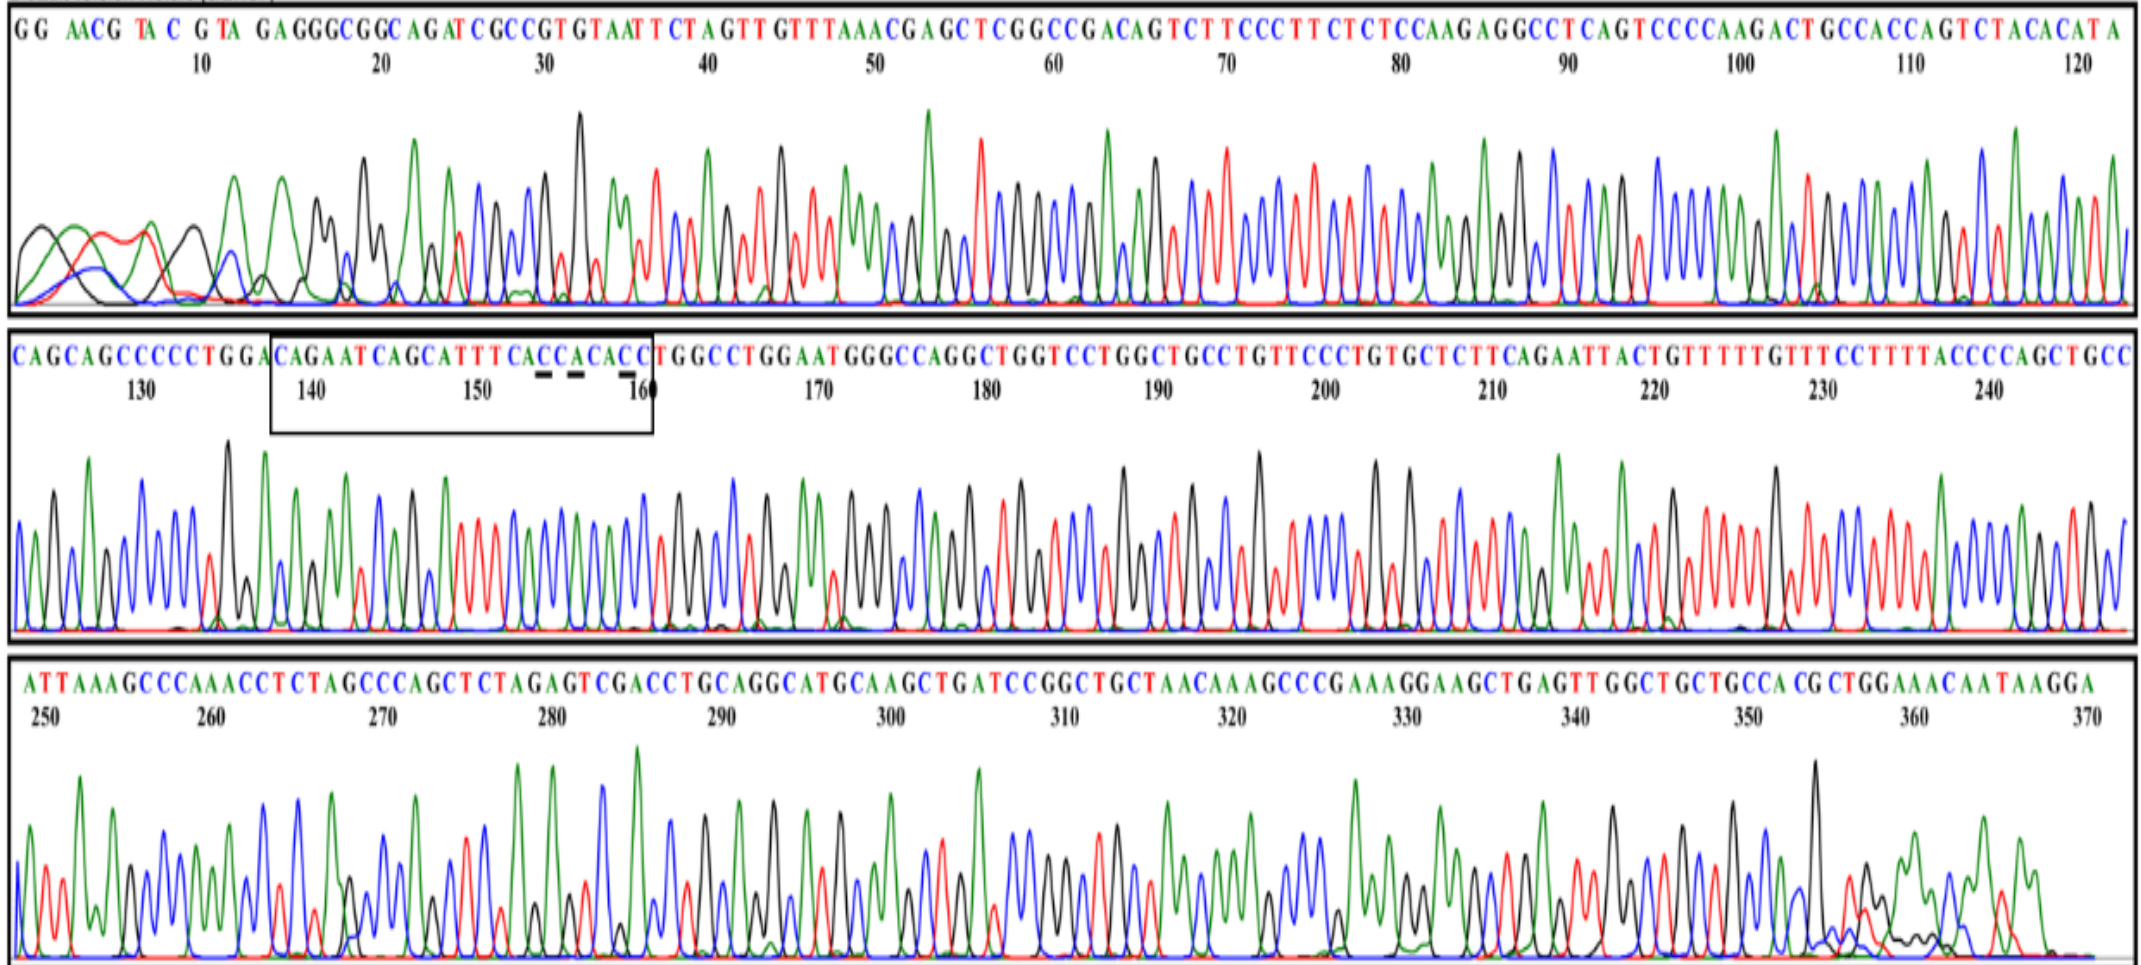

**Figure S1.** The sequencing results of pmirGLO-DDX41 site-directed mutation plasmid

The black box shows the sequence matching with miR-H2-3p in paper, the black underline of nucleotides shows the mutation sites.

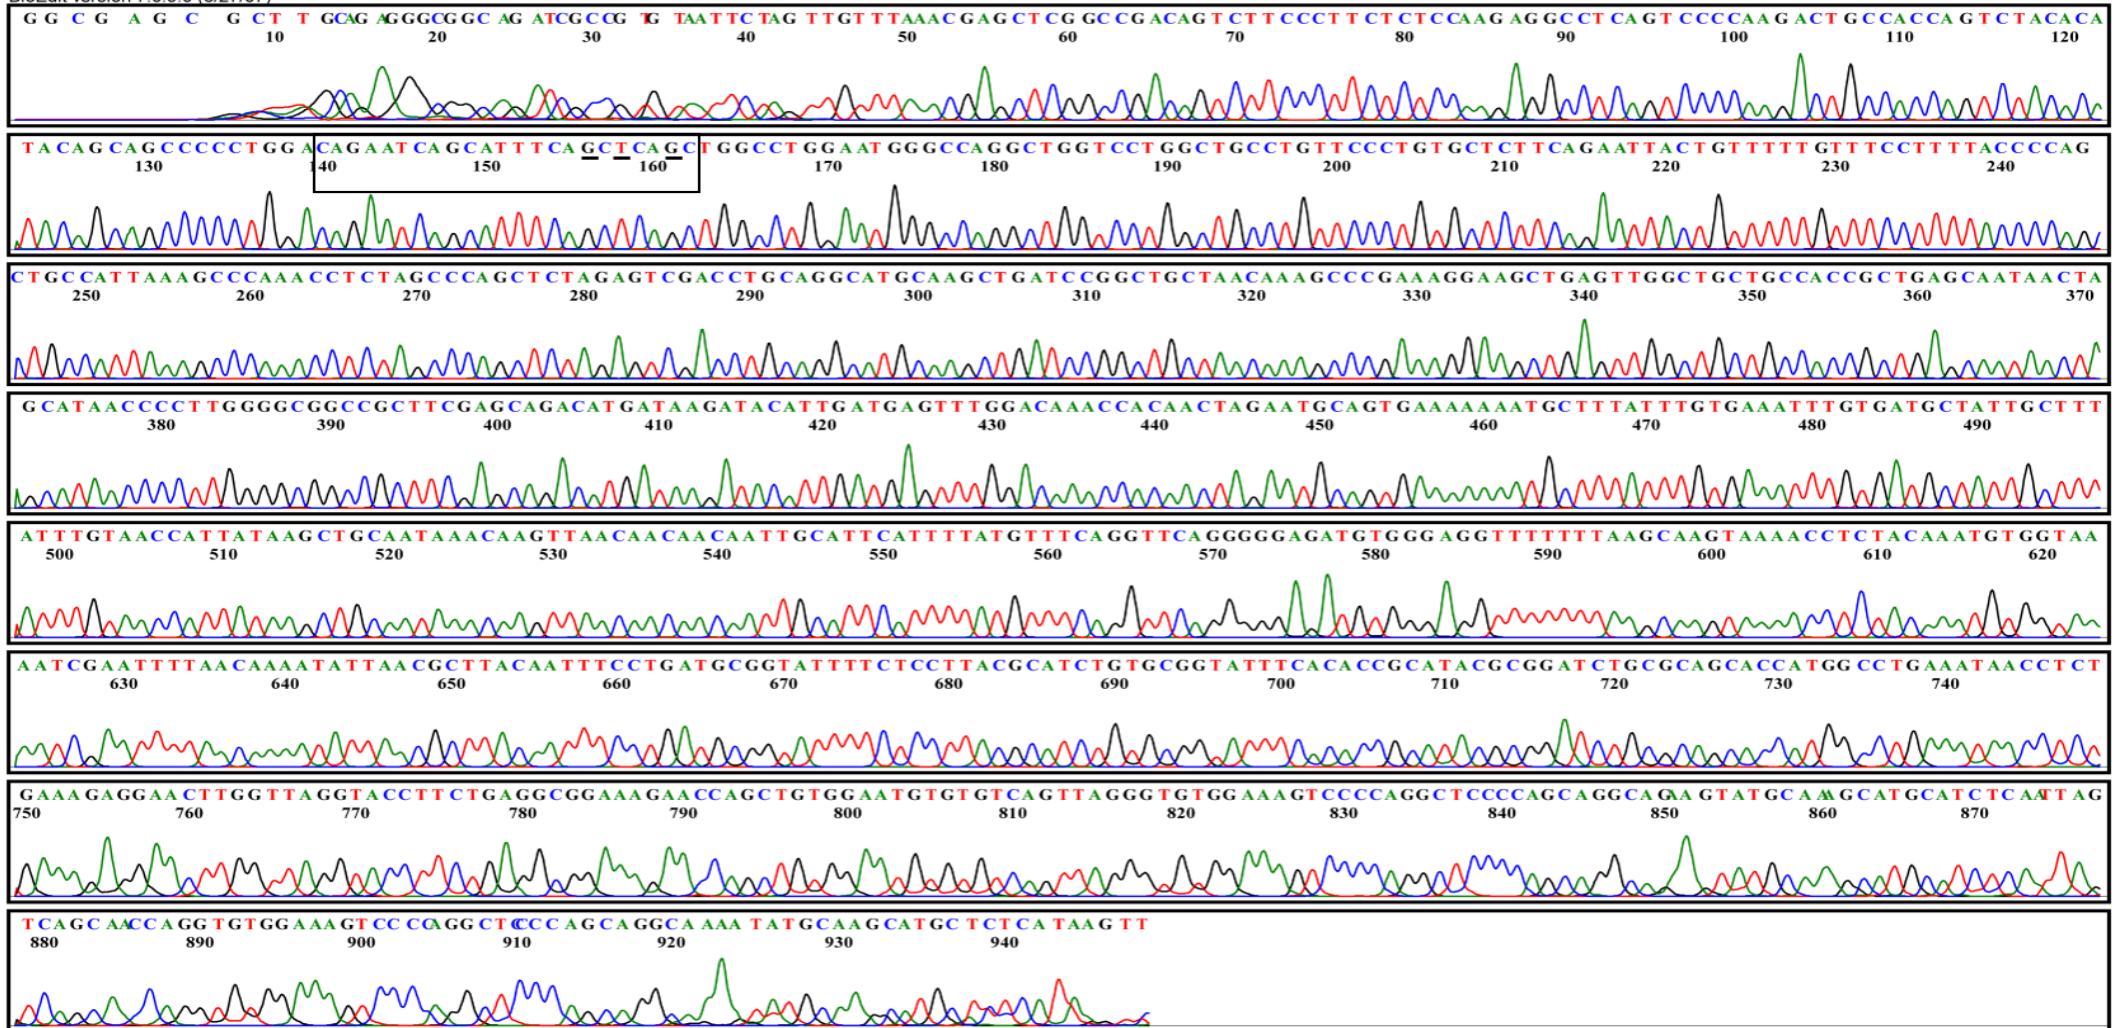

Figure S2. The sequencing results of pmirGLO-DDX41 wild type plasmid
